# Supplementary material
Source: HighWire-hosted journal article supplement (https://mentalhealth.bmj.com/content/25/2/54)
Supplement: inline-supplementary-material-2 [file inline-supplementary-material-2.pdf]

## Supplementary material

### Online-only tables

**eTable 1.** Antipsychotic medications, ATC classification codes and type

**eTable 2.** Covariate definitions, source data, and relevant diagnostic, medication codes

**eTable 3.** Hazard ratios and 95% confidence intervals (CIs) comparing the risk for ADHD in exposed and unexposed children, stratified by maternal psychiatric disorder

**eTable 4.** Hazard ratios and 95% confidence intervals (CIs) for child ADHD comparing the risk by varying patterns of maternal antipsychotic use and psychiatric disorders and in siblings exposed and unexposed to antipsychotics *in utero*

**eTable 5.** hazard ratios and 95% confidence intervals (CIs) comparing the risk for ADHD in exposed and unexposed children, with antipsychotic exposure defined as  $\geq 2$  filled prescriptions

**eTable 6.** Hazard ratios and 95% confidence intervals (CIs) comparing the risk for ADHD in exposed and unexposed children, with Norwegian cohort restricted to births after 2008

**eTable 7.** Hazard ratios and 95% confidence intervals (CIs) comparing the risk for ASD in exposed and unexposed children, stratified by maternal psychiatric disorder

**eTable 8.** Hazard ratios 95% confidence intervals (CIs) for child ASD comparing the risk by varying patterns of maternal antipsychotic use and psychiatric disorders and in siblings exposed and unexposed to antipsychotics *in utero*

**eTable 9.** Hazard ratios and 95% confidence intervals (CIs) comparing the risk for ASD in exposed and unexposed children, with antipsychotic exposure defined as  $\geq 2$  filled prescriptions

**eTable 10.** Hazard ratios and 95% confidence intervals (CIs) comparing the risk for ASD in exposed and unexposed children, with Norwegian cohort restricted to births after 2008

**eTable 11.** Hazard ratios and 95% confidence intervals (CIs) comparing the risk for ADHD and ASD in exposed and unexposed children in the sub-sample with at least one sibling with discordant antipsychotic exposure and outcome in the pooled data from Finland, Iceland, Norway, and Sweden (from 4533 clusters)

**eTable 12.** Distribution of exposures and outcomes among the siblings discordant on exposure and outcome or exposure only in the pooled data from Finland, Iceland, Norway, and Sweden

### Online-only figures

**eFigure 1.** Flow chart of cohort selection

**Cohort selection: Exclusion criteria**

- i. Recorded pregnancies with missing birth date, birthweight, or gestational age at birth.
- ii. Recorded pregnancies with invalid gestational age
  - a. Invalid based on recorded GA: Children with recorded gestational length  $\leq 154$  days ( $\leq$ gestational week 22+0) and  $> 308$  days ( $>$ gestational week 44+0),
  - b. Invalid based on birthweight: GA & sex-specific BW z-score  $> 4$  SD and GA  $< 35$  weeks.
- iii. Children diagnosed with fetal chromosomal/genetic anomalies or fetal alcohol syndrome, i.e., ICD-9 (27911, 7531, 7560, 7580-7583, 7585-7589, 7898, 76071) and ICD-10 codes (D821, Q619, Q751, Q754, Q87, Q90 – Q94, Q96–Q99, Q860) as recorded in the Nordic Medical Birth, Congenital Malformation or Patient Registers within the first year after date of birth (DOB).
- iv. Children with a recorded birth weight  $< 300$  grams and  $> 7000$  grams.
- v. Children where information on sex is missing/unknown/undefined.
- vi. Recorded pregnancies solely exposed to prochlorperazine (but not any other antipsychotic drug) between LMP and birth.
- vii. Recorded pregnancies solely exposed to antipsychotics between LMP-90 and LMP but not between LMP and birth.

We excluded children with missing or invalid data on birth date, gestational age or birth weight, those with missing data on sex, and those diagnosed with fetal chromosomal/genetic anomalies or fetal alcohol syndrome within the first year after birth (eFigure 1). Gestational age was essential to accurately assess exposure time windows during pregnancy, as the ascertainment of last menstrual period relied on this information. Since we used birth weight and sex in our algorithm to identify valid gestational age (see below), births with incomplete information on these variables had to be excluded. We also excluded children a chromosomal anomaly or fetal alcohol spectrum disorder diagnosed in the first year after birth. These diagnoses were not expected to be caused by antipsychotic exposure; we preferred to handle potential confounding by restriction rather than adjusting for these uncommon but strong risk factors.

eTable 1. Antipsychotic medications, ATC classification codes and type

| ATC          | Exposure                                        | Type    |
|--------------|-------------------------------------------------|---------|
| <b>N05A</b>  | <b>Antipsychotics</b>                           |         |
| <b>N05AA</b> | <b>Phenothiazines with aliphatic side-chain</b> |         |
| N05AA01      | chlorpromazine                                  | Typical |
| N05AA02      | levomepromazine                                 | Typical |
| N05AA03      | promazine                                       | Typical |
| N05AA04      | acepromazine                                    | Typical |
| N05AA05      | triflupromazine                                 | Typical |
| N05AA06      | cyamemazine                                     | Typical |
| N05AA07      | chlorproethazine                                | Typical |
| <b>N05AB</b> | <b>Phenothiazines with piperazine structure</b> |         |
| N05AB01      | dixyrazine                                      | Typical |
| N05AB02      | fluphenazine                                    | Typical |
| N05AB03      | perphenazine                                    | Typical |
| N05AB05      | thiopropazate                                   | Typical |
| N05AB06      | trifluoperazine                                 | Typical |
| N05AB07      | acetophenazine                                  | Typical |
| N05AB08      | thiopropazine                                   | Typical |
| N05AB09      | butaperazine                                    | Typical |
| N05AB10      | perazine                                        | Typical |
| <b>N05AC</b> | <b>Phenothiazines with piperidine structure</b> |         |
| N05AC01      | periciazine                                     | Typical |
| N05AC02      | thioridazine                                    | Typical |
| N05AC03      | mesoridazine                                    | Typical |
| N05AC04      | pipotiazine                                     | Typical |

|              |                                                                |          |
|--------------|----------------------------------------------------------------|----------|
| <b>N05AD</b> | <b><i>Butyrohenone derivatives</i></b>                         |          |
| N05AD01      | haloperidol                                                    | Typical  |
| N05AD02      | trifluoperidol                                                 | Typical  |
| N05AD03      | melperone                                                      | Typical  |
| N05AD04      | moperone                                                       | Typical  |
| N05AD05      | pipamperone                                                    | Typical  |
| N05AD06      | bromperidol                                                    | Typical  |
| N05AD07      | benperidol                                                     | Typical  |
| N05AD08      | droperidol                                                     | Typical  |
| N05AD09      | fluanisone                                                     | Typical  |
| <b>N05AE</b> | <b><i>Indole derivatives</i></b>                               |          |
| N05AE01      | oxypertine                                                     | Typical  |
| N05AE02      | molindone                                                      | Typical  |
| N05AE03      | sertindole                                                     | Atypical |
| N05AE04      | ziprasidone                                                    | Atypical |
| N05AE05      | lurasidone                                                     | Atypical |
| <b>N05AF</b> | <b><i>Thioxanthene derivatives</i></b>                         |          |
| N05AF01      | flupentixol                                                    | Typical  |
| N05AF02      | clopenthixol                                                   | Typical  |
| N05AF03      | chlorprothixene                                                | Typical  |
| N05AF04      | tiotixene                                                      | Typical  |
| N05AF05      | zuclopenthixol                                                 | Typical  |
| <b>N05AG</b> | <b><i>Diphenylbutylpiperidine derivatives</i></b>              |          |
| N05AG01      | fluspirilene                                                   | Typical  |
| N05AG02      | pimozide                                                       | Typical  |
| N05AG03      | penfluridol                                                    | Typical  |
| <b>N05AH</b> | <b><i>Diazepines, oxazepines, thiazepines and oxepines</i></b> |          |

|                |                                    |          |
|----------------|------------------------------------|----------|
| <b>N05AH01</b> | loxapine                           | Typical  |
| <b>N05AH02</b> | clozapine                          | Atypical |
| <b>N05AH03</b> | olanzapine                         | Atypical |
| <b>N05AH04</b> | quetiapine                         | Atypical |
| <b>N05AH05</b> | asenapine                          | Atypical |
| <b>N05AH06</b> | clotiapine                         | Typical  |
| <b>N05AL</b>   | <b><i>Benzamides</i></b>           |          |
| <b>N05AL01</b> | sulpiride                          | Atypical |
| <b>N05AL02</b> | sultopride                         | Atypical |
| <b>N05AL03</b> | tiapride                           | Typical  |
| <b>N05AL04</b> | remoxipride                        | Atypical |
| <b>N05AL05</b> | amisulpride                        | Atypical |
| <b>N05AL06</b> | veralipride                        | Typical  |
| <b>N05AL07</b> | levosulpiride                      | Atypical |
| <b>N05AX</b>   | <b><i>Other antipsychotics</i></b> |          |
| <b>N05AX07</b> | prothipendyl                       | Typical  |
| <b>N05AX08</b> | risperidone                        | Atypical |
| <b>N05AX10</b> | mosapramine                        | Atypical |
| <b>N05AX11</b> | zotepine                           | Atypical |
| <b>N05AX12</b> | aripiprazole                       | Atypical |
| <b>N05AX13</b> | paliperidone                       | Atypical |
| <b>N05AX14</b> | iloperidone                        | Atypical |
| <b>N05AX15</b> | cariprazine                        | Atypical |
| <b>N05AX16</b> | brexpiprazole                      | Atypical |
| <b>N05AX17</b> | pimavanserin                       | Atypical |

ATC, Anatomical Therapeutic Chemical

eTable 2. Covariate definitions, source data, and relevant diagnostic, medication codes

| Covariate                 | Time frame          | Functional form of variable and comments                                                                                                                            | Data source <sup>a</sup> | definition                                                                                                            | ATC | Codes  |      |
|---------------------------|---------------------|---------------------------------------------------------------------------------------------------------------------------------------------------------------------|--------------------------|-----------------------------------------------------------------------------------------------------------------------|-----|--------|------|
|                           |                     |                                                                                                                                                                     |                          |                                                                                                                       |     | ICD-10 | ICPC |
| Calendar year of birth    | Year of delivery    | Continuous, 1997-2017                                                                                                                                               | MBR                      |                                                                                                                       |     |        |      |
| Maternal age              | At delivery         | Continuous                                                                                                                                                          | MBR                      |                                                                                                                       |     |        |      |
| Maternal age categories   | At delivery         | <20; 20-24; 25-29; 30-34; 35-39; ≥40                                                                                                                                | MBR                      |                                                                                                                       |     |        |      |
| Maternal education        | In year of delivery | Compulsory education or less (ISCED: 0,1,2); Secondary education (ISCED: 3,4); Post-secondary education (ISCED: 5,6); Post-graduate education (ISCED: 7,8); Missing | NSI                      | Highest achieved education in year of birth, based on ISCED 2011 categorization as recorded by Statistics Institution |     |        |      |
| Cohabitation              | In year of delivery | No; Yes; Missing                                                                                                                                                    | MBR                      |                                                                                                                       |     |        |      |
| Maternal country of birth | n/a                 | Mother born in the country of delivery or not<br>No; Yes                                                                                                            | NSI<br>MBR               |                                                                                                                       |     |        |      |
| Parity                    | n/a                 | Number of previous deliveries<br>0; 1; ≥2                                                                                                                           | MBR                      |                                                                                                                       |     |        |      |
| Child sex                 | n/a                 | Female; Male                                                                                                                                                        | MBR                      |                                                                                                                       |     |        |      |
| BMI                       | In early pregnancy  | Continuous. Set to missing for those with BMI values below 14 or above 55.                                                                                          | MBR                      | As recorded in MBR or calculated from maternal weight and height at first antenatal visit (kg/m <sup>2</sup> )        |     |        |      |
| BMI                       | In early pregnancy  | Categorical                                                                                                                                                         | MBR                      |                                                                                                                       |     |        |      |

| Covariate                                                  | Time frame              | Functional form of variable and comments                                                                  | Data source <sup>a</sup> | definition                                 | ATC | Codes          |                   |
|------------------------------------------------------------|-------------------------|-----------------------------------------------------------------------------------------------------------|--------------------------|--------------------------------------------|-----|----------------|-------------------|
|                                                            |                         |                                                                                                           |                          |                                            |     | ICD-10         | ICPC              |
| Smoking                                                    | Early pregnancy         | <18.5; 18.5 to <25; 2: 25 to <30; 30 to <35; >= 35; Missing<br>No; Yes; Missing<br>Iceland: not available | MBR                      |                                            |     |                |                   |
| <b>Maternal comorbidity</b>                                | LMP - 365 days to birth | No; Yes                                                                                                   | NPR<br>MBR               | ≥1 diagnosis of listed maternal conditions |     |                |                   |
| Pre-existing diabetes                                      |                         |                                                                                                           |                          |                                            |     | E10-E14        | T89<br>T90<br>W85 |
| Pre-existing hypertension                                  |                         |                                                                                                           |                          |                                            |     | I10-I15<br>O10 | K86<br>K87        |
| Polycystic ovary syndrome                                  |                         |                                                                                                           |                          |                                            |     | E28.2          |                   |
| Migraine                                                   |                         |                                                                                                           |                          |                                            |     | G43            | N89               |
| Cluster headache                                           |                         |                                                                                                           |                          |                                            |     | G44            | N90               |
| Epilepsy or convulsion, or epilepsy complicating pregnancy |                         |                                                                                                           |                          |                                            |     | G40<br>G41     | N88               |
| <b>Maternal psychotic or bipolar disorders</b>             | LMP - 365 days to birth | No; Yes                                                                                                   | NPR<br>MBR               | ≥1 diagnosis of listed maternal conditions |     |                |                   |
| Bipolar disorders                                          |                         |                                                                                                           |                          |                                            |     | F30-F31        |                   |
| Schizophrenia and other psychotic disorders                |                         |                                                                                                           |                          |                                            |     | F20-F29        |                   |
| <b>Other maternal psychiatric disorders</b>                | LMP - 365 days to birth | No; Yes                                                                                                   | NPR<br>MBR               | ≥1 diagnosis of listed maternal conditions |     |                |                   |
| Substance use disorder                                     |                         |                                                                                                           |                          |                                            |     | F10-F19        |                   |
| Depression and other mood disorders, excl. bipolar         |                         |                                                                                                           |                          |                                            |     | F32-F39        |                   |

| Covariate                                   | Time frame             | Functional form of variable and comments | Data source <sup>a</sup> | definition                                          | ATC                                      | Codes                                     |      |
|---------------------------------------------|------------------------|------------------------------------------|--------------------------|-----------------------------------------------------|------------------------------------------|-------------------------------------------|------|
|                                             |                        |                                          |                          |                                                     |                                          | ICD-10                                    | ICPC |
| Anxiety disorders                           |                        |                                          |                          |                                                     |                                          | F40-F48                                   |      |
| Personality disorders                       |                        |                                          |                          |                                                     |                                          | F60-F69                                   |      |
| Intellectual disability                     |                        |                                          |                          |                                                     |                                          | F70-F79                                   |      |
| Disorders of psychological development      |                        |                                          |                          |                                                     |                                          | F80-F89                                   |      |
| Autism spectrum disorder                    |                        |                                          |                          |                                                     |                                          | F84.0<br>F84.1<br>F84.5                   |      |
| Attention/deficit-hyperactivity disorder    |                        |                                          |                          |                                                     |                                          | F90.0<br>F90.1<br>F90.2<br>F90.8<br>F90.9 |      |
| Suicide attempts                            |                        |                                          |                          |                                                     |                                          | X60-X84<br>Y10-Y34                        |      |
| <b>Use of known teratogenic medications</b> | LMP - 90 days to birth | No; Yes                                  | PDR                      | ≥1 prescription fills for any of listed medications |                                          |                                           |      |
| Warfarin                                    |                        |                                          |                          |                                                     | B01AA03                                  |                                           |      |
| Antineoplastic agents                       |                        |                                          |                          |                                                     | L01                                      |                                           |      |
| Isotretinoin                                |                        |                                          |                          |                                                     | D10AD04<br>D10BA01<br>D10AD54            |                                           |      |
| Systemic retinoids for psoriasis dermatitis |                        |                                          |                          |                                                     | D05BB<br>D11AH04                         |                                           |      |
| Misopristol                                 |                        |                                          |                          |                                                     | A02BB01<br>G02AD06<br>M01AB55<br>M01AE56 |                                           |      |

| Covariate                                                                | Time frame             | Functional form of variable and comments | Data source <sup>a</sup> | definition                                          | Codes               |        |      |
|--------------------------------------------------------------------------|------------------------|------------------------------------------|--------------------------|-----------------------------------------------------|---------------------|--------|------|
|                                                                          |                        |                                          |                          |                                                     | ATC                 | ICD-10 | ICPC |
| Thalidomide                                                              |                        |                                          |                          |                                                     | L04AX02             |        |      |
| Valproate                                                                |                        |                                          |                          |                                                     | N03AG01             |        |      |
| <b>Use of suspected teratogenic medications</b>                          | LMP - 90 to birth      | No; Yes                                  | PDR                      | ≥1 prescription fills for any of listed medications |                     |        |      |
| Lithium                                                                  |                        |                                          |                          |                                                     | N05AN01             |        |      |
| Antiepileptics excl. valproate                                           |                        |                                          |                          |                                                     | N03 [excl. N03AG01] |        |      |
| Drugs acting on the renin-angiotensin system, incl. ACE inhibitors, ARBs |                        |                                          |                          |                                                     | C09                 |        |      |
| Antithyroid drugs                                                        |                        |                                          |                          |                                                     | H03B                |        |      |
| Mycophenolic acid                                                        |                        |                                          |                          |                                                     | L04AA13             |        |      |
| Leflunomide                                                              |                        |                                          |                          |                                                     | L04AA13             |        |      |
| Teriflunomide                                                            |                        |                                          |                          |                                                     | L04AA31             |        |      |
| Lenalidomide                                                             |                        |                                          |                          |                                                     | L04AX04             |        |      |
| Pomalidomide                                                             |                        |                                          |                          |                                                     | L04AX06             |        |      |
| Ergot alkaloids                                                          |                        |                                          |                          |                                                     | N02C                |        |      |
| <b>Other medications during pregnancy</b>                                | LMP - 90 days to birth | No; Yes                                  | PDR                      | ≥1 prescription fills for any of listed medications |                     |        |      |
| Antidepressants                                                          |                        |                                          |                          |                                                     | N06A                |        |      |
| Antidiabetics                                                            |                        |                                          |                          |                                                     | A10                 |        |      |
| Benzodiazepines                                                          |                        |                                          |                          |                                                     | N05BA<br>N05CD      |        |      |
| Triptans                                                                 |                        |                                          |                          |                                                     | N02CC               |        |      |
| Opioids                                                                  |                        |                                          |                          |                                                     | N02A                |        |      |
| Paracetamol                                                              |                        |                                          |                          |                                                     | N02BE01             |        |      |

MBR, Medical Birth Registry; Pop Reg, Population Register; NPR, National Patient Register; NPCD, Norwegian Primary Care Data; PDR, Prescription Drug Register; NSI, National Statistical Institute; ISCED, International Standard Classification of Education; ATC, Anatomical Therapeutic Chemical Classification; ICD International Classification of Disease; ICPC, International Classification of Primary Care; BMI, body mass index; n/a, not applicable; LMP, last menstrual period; AP, antipsychotic; ACE inhibitors, angiotensin-converting-enzyme inhibitors; ARBs, angiotensin II receptor blockers

<sup>a</sup>For Norway, only the MBR will provide information on maternal comorbidity from 2004 to 2008 since the Norwegian Patient Register was not available until 2009

eTable 3. Hazard ratios and 95% confidence intervals (CIs) comparing the risk for ADHD in exposed and unexposed children, stratified by maternal psychiatric disorder

| Antipsychotic exposure             | No. with ADHD / N | Person-years at risk | Crude              | Hazard ratio (95% CI) |                      |
|------------------------------------|-------------------|----------------------|--------------------|-----------------------|----------------------|
|                                    |                   |                      |                    | Model 1 <sup>a</sup>  | Model 2 <sup>b</sup> |
| Maternal psychiatric disorder      |                   |                      |                    |                       |                      |
| Psychotic or bipolar disorders     |                   |                      |                    |                       |                      |
| Unexposed                          | 222 / 8356        | 57727                | 1.00 [Reference]   | 1.00 [Reference]      | 1.00 [Reference]     |
| Exposed anytime during pregnancy   | 126 / 4385        | 33788                | 0.87 (0.70 – 1.09) | 0.94 (0.75 – 1.17)    | 0.90 (0.70 – 1.15)   |
| Other psychiatric disorders        |                   |                      |                    |                       |                      |
| Unexposed                          | 7751 / 415906     | 3078602              | 1.00 [Reference]   | 1.00 [Reference]      | 1.00 [Reference]     |
| Exposed anytime during pregnancy   | 162 / 14547       | 32998                | 1.57 (1.34 – 1.84) | 1.39 (1.18 – 1.63)    | 0.96 (0.82 – 1.12)   |
| No recorded psychiatric conditions |                   |                      |                    |                       |                      |
| Unexposed                          | 63802 / 3884358   | 38727009             | 1.00 [Reference]   | 1.00 [Reference]      | 1.00 [Reference]     |
| Exposed anytime during pregnancy   | 194 / 5352        | 54606                | 1.94 (1.68 – 2.23) | 1.68 (1.46 – 1.93)    | 1.44 (1.25 – 1.66)   |

<sup>a</sup>Adjusted for source country, birth year, sex of child, maternal age, and parity

<sup>b</sup>Adjusted for source country, birth year, sex of child, maternal age, parity, maternal education, cohabitation, mother born within source country, BMI, smoking, maternal comorbidity, use of known teratogens, use of suspected teratogens, other medications during pregnancy

*eTable 4. Hazard ratios and 95% confidence intervals (CIs) for child ADHD comparing the risk by varying patterns of maternal antipsychotic use and psychiatric disorders and in siblings exposed and unexposed to antipsychotics in utero*

| Antipsychotic exposure                                                   | No. with ADHD / N | Person-years at risk | Crude              | Hazard ratio (95% CI) |                      |
|--------------------------------------------------------------------------|-------------------|----------------------|--------------------|-----------------------|----------------------|
|                                                                          |                   |                      |                    | Model 1 <sup>a</sup>  | Model 2 <sup>b</sup> |
| Maternal antipsychotic use (secondary analyses)                          |                   |                      |                    |                       |                      |
| Pre-pregnancy use only                                                   | 355 / 9743        | 76387                | 1.00 [Reference]   | 1.00 [Reference]      | 1.00 [Reference]     |
| Use in pregnancy                                                         | 303 / 10273       | 83827                | 0.69 (0.59 - 0.81) | 0.73 (0.62 - 0.86)    | 0.74 (0.62 - 0.87)   |
| No use before or during pregnancy                                        | 48736 / 15433823  | 15027190             | 1.00 [Reference]   | 1.00 [Reference]      | 1.00 [Reference]     |
| Pre-pregnancy use                                                        | 355 / 9743        | 76387                | 2.77 (2.49 - 3.07) | 2.61 (2.35 - 2.90)    | 1.44 (1.29 - 1.60)   |
| No use before or during pregnancy without psychotic or bipolar disorders | 48593 / 3128500   | 27290564             | 1.00 [Reference]   | 1.00 [Reference]      | 1.00 [Reference]     |
| No use before or during pregnancy with psychotic or bipolar disorders    | 143 / 5652        | 36299                | 3.00 (2.54 - 3.53) | 2.82 (2.39 - 3.32)    | 1.79 (1.52 - 2.11)   |
| Maternal psychiatric disorder (secondary analyses)                       |                   |                      |                    |                       |                      |
| Psychotic and bipolar disorders                                          |                   |                      |                    |                       |                      |
| Pre-pregnancy use only                                                   | 33 / 1354         | 9057                 | 1.00 [Reference]   | 1.00 [Reference]      | 1.00 [Reference]     |
| Use in pregnancy                                                         | 63 / 2684         | 18861                | 0.89 (0.71 - 1.12) | 0.81 (0.54 - 1.23)    | 0.81 (0.51 - 1.29)   |
| Other psychiatric disorders                                              |                   |                      |                    |                       |                      |
| Pre-pregnancy use only                                                   | 171 / 4673        | 32646                | 1.00 [Reference]   | 1.00 [Reference]      | 1.00 [Reference]     |
| Use in pregnancy                                                         | 104 / 3784        | 27075                | 0.69 (0.54 - 0.89) | 0.69 (0.54 - 0.89)    | 0.70 (0.55 - 0.91)   |
| No recorded psychiatric conditions                                       |                   |                      |                    |                       |                      |
| Pre-pregnancy use only                                                   | 151 / 3716        | 34685                | 1.00 [Reference]   | 1.00 [Reference]      | 1.00 [Reference]     |
| Use in pregnancy                                                         | 136 / 3805        | 37890                | 0.65 (0.51 - 0.83) | 0.75 (0.57 - 0.98)    | 0.85 (0.64 - 1.12)   |
| Sibling analysis                                                         |                   |                      |                    |                       |                      |
| Unexposed                                                                | 354 / 835         | 8888                 | 1.00 [Reference]   | 1.00 [Reference]      | 1.00 [Reference]     |
| Exposed anytime during pregnancy                                         | 185 / 483         | 3927                 | 1.28 (0.98 - 1.67) | 1.17 (0.84 - 1.62)    | 1.14 (0.79 - 1.64)   |

<sup>a</sup>Adjusted for source country, birth year, sex of child, maternal age, and parity

<sup>b</sup>Adjusted for source country, birth year, sex of child, maternal age, parity, maternal education, cohabitation, mother born within source country, BMI, smoking, maternal comorbidity, use of known teratogens, use of suspected teratogens, other medications during pregnancy

*eTable 5. Hazard ratios and 95% confidence intervals (CIs) comparing the risk for ADHD in exposed and unexposed children, with antipsychotic exposure defined as  $\geq 2$  filled prescriptions*

| Antipsychotic exposure                    | No. with ADHD / N | Person-years at risk | Crude              | Hazard ratio (95% CI) |                      |
|-------------------------------------------|-------------------|----------------------|--------------------|-----------------------|----------------------|
|                                           |                   |                      |                    | Model 1 <sup>a</sup>  | Model 2 <sup>b</sup> |
| Unexposed                                 | 71994 / 4315656   | 41924124             | 1.00 [Reference]   | 1.00 [Reference]      | 1.00 [Reference]     |
| Exposed anytime during pregnancy          | 263 / 8430        | 69426                | 2.43 (2.15 - 2.74) | 2.29 (2.03 - 2.58)    | 1.07 (0.94 - 1.22)   |
| <b>Type of antipsychotic exposure</b>     |                   |                      |                    |                       |                      |
| Typical antipsychotics only               | 114 / 2797        | 32508                | 1.77 (1.47 - 2.12) | 1.84 (1.53 - 2.21)    | 1.04 (0.86 - 1.25)   |
| Atypical antipsychotics only              | 105 / 4815        | 29985                | 3.18 (2.62 - 3.85) | 2.55 (2.11 - 3.10)    | 1.02 (0.84 - 1.24)   |
| <b>Maternal psychiatric disorder</b>      |                   |                      |                    |                       |                      |
| <b>Psychotic or bipolar disorders</b>     |                   |                      |                    |                       |                      |
| Unexposed                                 | 250 / 9468        | 66222                | 1.00 [Reference]   | 1.00 [Reference]      | 1.00 [Reference]     |
| Exposed anytime during pregnancy          | 98 / 3273         | 25293                | 0.94 (0.74 - 1.19) | 1.02 (0.80 - 1.30)    | 0.97 (0.74 - 1.28)   |
| <b>Other psychiatric disorders</b>        |                   |                      |                    |                       |                      |
| Unexposed                                 | 7830 / 418725     | 3099245              | 1.00 [Reference]   | 1.00 [Reference]      | 1.00 [Reference]     |
| Exposed anytime during pregnancy          | 83 / 2910         | 21275                | 1.61 (1.30 - 2.00) | 1.44 (1.16 - 1.79)    | 0.92 (0.74 - 1.14)   |
| <b>No recorded psychiatric conditions</b> |                   |                      |                    |                       |                      |
| Unexposed                                 | 63914 / 3887463   | 38758658             | 1.00 [Reference]   | 1.00 [Reference]      | 1.00 [Reference]     |
| Exposed anytime during pregnancy          | 82 / 2247         | 22958                | 1.99 (1.60 - 2.46) | 1.90 (1.53 - 2.36)    | 1.53 (1.24 - 1.90)   |

<sup>a</sup>Adjusted for source country, birth year, sex of child, maternal age, and parity

<sup>b</sup>Adjusted for source country, birth year, sex of child, maternal age, parity, maternal education, cohabitation, mother born within source country, BMI, smoking, maternal comorbidity, use of known teratogens, use of suspected teratogens, other medications during pregnancy

eTable 6. Hazard ratios and 95% confidence intervals (CIs) comparing the risk for ADHD in exposed and unexposed children, with Norwegian cohort restricted to births after 2008

| Antipsychotic exposure                     | No. with ADHD / N | Person-years at risk | Crude              | Hazard ratio (95% CI) |                      |
|--------------------------------------------|-------------------|----------------------|--------------------|-----------------------|----------------------|
|                                            |                   |                      |                    | Model 1 <sup>a</sup>  | Model 2 <sup>b</sup> |
| Unexposed                                  | 64740 / 4087582   | 39311916             | 1.00 [Reference]   | 1.00 [Reference]      | 1.00 [Reference]     |
| Exposed anytime during pregnancy           | 401 / 14037       | 113560               | 2.37 (2.14 - 2.61) | 2.06 (1.86 - 2.27)    | 1.05 (0.94 - 1.16)   |
| Timing of exposure                         |                   |                      |                    |                       |                      |
| First trimester only                       | 171 / 5633        | 46250                | 2.38 (2.05 - 2.77) | 1.82 (1.56 - 2.12)    | 1.05 (0.90 - 1.23)   |
| Second/third trimester only                | 79 / 3046         | 25015                | 2.14 (1.71 - 2.67) | 1.99 (1.60 - 2.49)    | 0.96 (0.77 - 1.21)   |
| First trimester and second/third trimester | 151 / 5358        | 42294                | 2.51 (2.14 - 2.95) | 2.49 (2.13 - 2.92)    | 1.02 (0.86 - 1.21)   |
| Type of antipsychotic exposure             |                   |                      |                    |                       |                      |
| Typical antipsychotics only                | 207 / 5659        | 60673                | 1.86 (1.62 - 2.13) | 1.73 (1.51 - 1.98)    | 1.06 (0.92 - 1.21)   |
| Atypical antipsychotics only               | 151 / 7600        | 46425                | 3.13 (2.66 - 3.67) | 2.34 (1.99 - 2.75)    | 0.93 (0.79 - 1.10)   |

<sup>a</sup>Adjusted for source country, birth year, sex of child, maternal age, and parity

<sup>b</sup>Adjusted for source country, birth year, sex of child, maternal age, parity, maternal education, cohabitation, mother born within source country, BMI, smoking, maternal comorbidity, use of known teratogens, use of suspected teratogens, other medications during pregnancy

eTable 7. Hazard ratios and 95% confidence intervals (CIs) comparing the risk for ASD in exposed and unexposed children, stratified by maternal psychiatric disorder

| Antipsychotic exposure             | No. with ASD / N | Person-years at risk | Crude            | Hazard ratio (95% CI) |                      |
|------------------------------------|------------------|----------------------|------------------|-----------------------|----------------------|
|                                    |                  |                      |                  | Model 1 <sup>a</sup>  | Model 2 <sup>b</sup> |
| Maternal psychiatric disorder      |                  |                      |                  |                       |                      |
| Psychotic or bipolar disorders     |                  |                      |                  |                       |                      |
| Unexposed                          | 139 / 8356       | 57891                | 1.00 [Reference] | 1.00 [Reference]      | 1.00 [Reference]     |
| Exposed anytime during pregnancy   | 91 / 4385        | 33851                | 1.07 (0.82-1.40) | 1.29 (0.98-1.69)      | 1.28 (0.95-1.71)     |
| Other psychiatric disorders        |                  |                      |                  |                       |                      |
| Unexposed                          | 3829 / 415906    | 3089835              | 1.00 [Reference] | 1.00 [Reference]      | 1.00 [Reference]     |
| Exposed anytime during pregnancy   | 76 / 5729        | 42108                | 1.45 (1.16-1.82) | 1.44 (1.15-1.80)      | 1.09 (0.86-1.37)     |
| No recorded psychiatric conditions |                  |                      |                  |                       |                      |
| Unexposed                          | 34468 / 3884358  | 38834971             | 1.00 [Reference] | 1.00 [Reference]      | 1.00 [Reference]     |
| Exposed anytime during pregnancy   | 71 / 5352        | 55070                | 1.49 (1.18-1.88) | 1.54 (1.22-1.94)      | 1.27 (1.00-1.60)     |

<sup>a</sup>Adjusted for source country, birth year, sex of child, maternal age, and parity

<sup>b</sup>Adjusted for source country, birth year, sex of child, maternal age, parity, maternal education, cohabitation, mother born within source country, BMI, smoking, maternal comorbidity, use of known teratogens, use of suspected teratogens, other medications during pregnancy

*eTable 8. Hazard ratios and 95% confidence intervals (CIs) for child ASD comparing the risk by varying patterns of maternal antipsychotic use and psychiatric disorders and in siblings exposed and unexposed to antipsychotics in utero*

| Antipsychotic exposure                                                   | No. with ASD / N | Person-years at risk | Crude            | Hazard ratio (95% CI) |                      |
|--------------------------------------------------------------------------|------------------|----------------------|------------------|-----------------------|----------------------|
|                                                                          |                  |                      |                  | Model 1 <sup>a</sup>  | Model 2 <sup>b</sup> |
| Maternal antipsychotic use (secondary analyses)                          |                  |                      |                  |                       |                      |
| Pre-pregnancy use only                                                   | 174 / 9743       | 76873                | 1.00 [Reference] | 1.00 [Reference]      | 1.00 [Reference]     |
| Use in pregnancy                                                         | 174 / 10273      | 84178                | 0.88 (0.71-1.09) | 0.93 (0.75-1.17)      | 0.88 (0.70-1.10)     |
| No use before or during pregnancy                                        | 30815 / 3134152  | 27377539             | 1.00 [Reference] | 1.00 [Reference]      | 1.00 [Reference]     |
| Pre-pregnancy use                                                        | 174 / 9743       | 76873                | 2.08 (1.79-2.41) | 2.18 (1.87-2.53)      | 1.40 (1.19-1.63)     |
| No use before or during pregnancy without psychotic or bipolar disorders | 30716 / 3128500  | 27341143             | 1.00 [Reference] | 1.00 [Reference]      | 1.00 [Reference]     |
| No use before or during pregnancy with psychotic or bipolar disorders    | 99 / 5652        | 36395                | 2.70 (2.22-3.29) | 2.43 (1.99-2.96)      | 1.89 (1.54-2.30)     |
| Maternal psychiatric disorder (secondary analyses)                       |                  |                      |                  |                       |                      |
| Psychotic and bipolar disorders                                          |                  |                      |                  |                       |                      |
| Pre-pregnancy use only                                                   | 18 / 1354        | 9058                 | 1.00 [Reference] | 1.00 [Reference]      | 1.00 [Reference]     |
| Use in pregnancy                                                         | 68 / 2684        | 18831                | 1.80 (1.07-3.01) | 1.72 (1.01-2.92)      | 1.67 (0.99-2.81)     |
| Other psychiatric disorders                                              |                  |                      |                  |                       |                      |
| Pre-pregnancy use only                                                   | 80 / 4673        | 32892                | 1.00 [Reference] | 1.00 [Reference]      | 1.00 [Reference]     |
| Use in pregnancy                                                         | 58 / 3784        | 27221                | 0.84 (0.60-1.19) | 0.83 (0.59-1.17)      | 0.84 (0.59-1.20)     |
| No recorded psychiatric conditions                                       |                  |                      |                  |                       |                      |
| Pre-pregnancy use only                                                   | 76 / 3716        | 34923                | 1.00 [Reference] | 1.00 [Reference]      | 1.00 [Reference]     |
| Use in pregnancy                                                         | 48 / 3805        | 38126                | 0.57 (0.40-0.82) | 0.63 (0.41-0.97)      | 0.62 (0.40-0.96)     |
| Sibling analysis                                                         |                  |                      |                  |                       |                      |
| Unexposed                                                                | 115 / 304        | 3042                 | 1.00 [Reference] | 1.00 [Reference]      | 1.00 [Reference]     |
| Exposed anytime during pregnancy                                         | 82 / 186         | 1504                 | 1.38 (0.94-2.03) | 1.20 (0.74-1.95)      | 1.34 (0.75-2.39)     |

<sup>a</sup>Adjusted for source country, birth year, sex of child, maternal age, and parity

<sup>b</sup>Adjusted for source country, birth year, sex of child, maternal age, parity, maternal education, cohabitation, mother born within source country, BMI, smoking, maternal comorbidity, use of known teratogens, use of suspected teratogens, other medications during pregnancy

*eTable 9. Hazard ratios and 95% confidence intervals (CIs) comparing the risk for ASD in exposed and unexposed children, with antipsychotic exposure defined as  $\geq 2$  filled prescriptions*

| Antipsychotic exposure                    | No. with ASD / N | Person-years at risk | Crude            | Hazard ratio (95% CI) |                      |
|-------------------------------------------|------------------|----------------------|------------------|-----------------------|----------------------|
|                                           |                  |                      |                  | Model 1 <sup>a</sup>  | Model 2 <sup>b</sup> |
| Unexposed                                 | 38538 / 4315656  | 42043861             | 1.00 [Reference] | 1.00 [Reference]      | 1.00 [Reference]     |
| Exposed anytime during pregnancy          | 136 / 8430       | 69864                | 2.30 (1.94-2.73) | 2.35 (1.99-2.78)      | 1.08 (0.89-1.30)     |
| <b>Type of antipsychotic exposure</b>     |                  |                      |                  |                       |                      |
| Typical antipsychotics only               | 52 / 2797        | 32779                | 1.71 (1.30-2.25) | 1.85 (1.41-2.42)      | 1.02 (0.77-1.34)     |
| Atypical antipsychotics only              | 69 / 4815        | 30046                | 3.09 (2.44-3.93) | 2.99 (2.36-3.79)      | 1.23 (0.95-1.59)     |
| <b>Maternal psychiatric disorder</b>      |                  |                      |                  |                       |                      |
| <b>Psychotic or bipolar disorders</b>     |                  |                      |                  |                       |                      |
| Unexposed                                 | 181 / 9468       | 66314                | 1.00 [Reference] | 1.00 [Reference]      | 1.00 [Reference]     |
| Exposed anytime during pregnancy          | 73 / 3273        | 25370                | 1.11 (0.83-1.47) | 1.30 (0.97-1.73)      | 1.30 (0.95-1.77)     |
| <b>Other psychiatric disorders</b>        |                  |                      |                  |                       |                      |
| Unexposed                                 | 4471 / 418725    | 828608               | 1.00 [Reference] | 1.00 [Reference]      | 1.00 [Reference]     |
| Exposed anytime during pregnancy          | 49 / 2910        | 21318                | 1.51 (1.11-2.05) | 1.52 (1.11-2.07)      | 1.10 (0.80-1.51)     |
| <b>No recorded psychiatric conditions</b> |                  |                      |                  |                       |                      |
| Unexposed                                 | 41684 / 3887463  | 38832132             | 1.00 [Reference] | 1.00 [Reference]      | 1.00 [Reference]     |
| Exposed anytime during pregnancy          | 27 / 2247        | 23152                | 1.43 (0.97-2.10) | 1.54 (1.05-2.26)      | 1.23 (0.84-1.82)     |

<sup>a</sup>Adjusted for source country, birth year, sex of child, maternal age, and parity

<sup>b</sup>Adjusted for source country, birth year, sex of child, maternal age, parity, maternal education, cohabitation, mother born within source country, BMI, smoking, maternal comorbidity, use of known teratogens, use of suspected teratogens, other medications during pregnancy

*eTable 10. Hazard ratios and 95% confidence intervals (CIs) comparing the risk for ASD in exposed and unexposed children, with Norwegian cohort restricted to births after 2008*

| Antipsychotic exposure                     | No. with ASD / N | Person-Years at risk | Crude            | Hazard Ratio (95% CI) |                      |
|--------------------------------------------|------------------|----------------------|------------------|-----------------------|----------------------|
|                                            |                  |                      |                  | Model 1 <sup>a</sup>  | Model 2 <sup>b</sup> |
| Unexposed                                  | 36808 / 4087582  | 39414709             | 1.00 [Reference] | 1.00 [Reference]      | 1.00 [Reference]     |
| Exposed anytime during pregnancy           | 233 / 14037      | 114109               | 2.35 (2.06-2.67) | 2.28 (2.01-2.60)      | 1.18 (1.02-1.36)     |
| <b>Timing of exposure</b>                  |                  |                      |                  |                       |                      |
| First trimester only                       | 101 / 5633       | 46394                | 2.52 (2.07-3.06) | 2.14 (1.77-2.61)      | 1.24 (1.01-1.52)     |
| Second/third trimester only                | 47 / 3046        | 25176                | 2.19 (1.65-2.91) | 2.35 (1.76-3.13)      | 1.19 (0.88-1.59)     |
| First trimester and second/third trimester | 85 / 5358        | 42537                | 2.34 (1.89-2.91) | 2.46 (1.99-3.05)      | 1.05 (0.83-1.34)     |
| <b>Type of antipsychotic exposure</b>      |                  |                      |                  |                       |                      |
| Typical antipsychotics only                | 109 / 5659       | 61090                | 1.86 (1.54-2.25) | 1.84 (1.52-2.22)      | 1.14 (0.94-1.39)     |
| Atypical antipsychotics only               | 109 / 7600       | 46451                | 3.12 (2.58-3.77) | 2.98 (2.47-3.59)      | 1.26 (1.02-1.55)     |

<sup>a</sup>Adjusted for source country, birth year, sex of child, maternal age, and parity

<sup>b</sup>Adjusted for source country, birth year, sex of child, maternal age, parity, maternal education, cohabitation, mother born within source country, BMI, smoking, maternal comorbidity, use of known teratogens, use of suspected teratogens, other medications during pregnancy

*eTable 11. Hazard ratios and 95% confidence intervals (CIs) comparing the risk for ADHD and ASD in exposed and unexposed children in the sub-sample with at least one sibling with discordant antipsychotic exposure and outcome in the pooled data from Finland, Iceland, Norway, and Sweden (from 4533 clusters)*

| <b>ADHD</b>                          | <b>No. with ADHD / N</b> | <b>Person-Years at risk</b> | <b>Crude</b>     | <b>Model 1<sup>a</sup></b> | <b>Model 2<sup>b</sup></b> |
|--------------------------------------|--------------------------|-----------------------------|------------------|----------------------------|----------------------------|
| <b>Standard analysis<sup>c</sup></b> |                          |                             |                  |                            |                            |
| Unexposed                            | 290/674                  | 6875                        | 1.00 [Reference] | 1.00 [Reference]           | 1.00 [Reference]           |
| Exposed anytime during pregnancy     | 150/392                  | 3068                        | 1.45 (1.17-1.80) | 1.21 (0.96-1.52)           | 1.15 (0.90-1.46)           |
| <b>Sibling analysis<sup>d</sup></b>  |                          |                             |                  |                            |                            |
| Unexposed                            | 290/674                  | 6875                        | 1.00 [Reference] | 1.00 [Reference]           | 1.00 [Reference]           |
| Exposed anytime during pregnancy     | 150/392                  | 3068                        | 1.21 (0.90-1.63) | 1.12 (0.78-1.61)           | 1.10 (0.73-1.65)           |
| <b>ASD</b>                           | <b>No. with ASD/ N</b>   | <b>Person-Years at risk</b> | <b>Crude</b>     | <b>Model 1<sup>a</sup></b> | <b>Model 2<sup>b</sup></b> |
| <b>Standard analysis<sup>c</sup></b> |                          |                             |                  |                            |                            |
| Unexposed                            | 84/236                   | 2278                        | 1.00 [Reference] | 1.00 [Reference]           | 1.00 [Reference]           |
| Exposed anytime during pregnancy     | 65/142                   | 1126                        | 1.70 (1.16-2.48) | 1.19 (0.79-1.78)           | 1.17 (0.76-1.79)           |
| <b>Sibling analysis<sup>d</sup></b>  |                          |                             |                  |                            |                            |
| Unexposed                            | 84/236                   | 2278                        | 1.00 [Reference] | 1.00 [Reference]           | 1.00 [Reference]           |
| Exposed anytime during pregnancy     | 65/142                   | 1126                        | 1.41 (0.92-2.17) | 1.34 (0.79-2.28)           | 1.62 (0.83-3.16)           |

<sup>a</sup>Adjusted for source country, birth year, sex of child, maternal age, and parity

<sup>b</sup>Adjusted for source country, birth year, sex of child, maternal age, parity, maternal education, cohabitation, mother born within source country, BMI, smoking, maternal comorbidity, use of known teratogens, use of suspected teratogens, other medications during pregnancy (missing indicator rather than 2-stage calibration for this sensitivity analysis)

<sup>c</sup>Cox proportional hazards regression models and robust standard errors accounting for the clustering of siblings

<sup>d</sup>Cox proportional hazards regression models with stratification on sibling cluster

*eTable 12. Distribution of exposures and outcomes among the siblings discordant on exposure and outcome or exposure only in the pooled data from Finland, Iceland, Norway, and Sweden*

|                                                                   | ADHD |      |      |      | ASD  |      |      |      |
|-------------------------------------------------------------------|------|------|------|------|------|------|------|------|
| Birth order                                                       | 1    | 2    | 3    | 4+   | 1    | 2    | 3    | 4+   |
| <b>Discordant exposure and outcome within the sibling cluster</b> |      |      |      |      |      |      |      |      |
| Exposed, %                                                        | 31.9 | 37.5 | 44.5 | 38.7 | 43.7 | 35.2 | 37.3 | 18.5 |
| Outcome, %                                                        | 69.2 | 33.1 | 17.5 | 6.5  | 62.0 | 32.4 | 16.4 | 14.8 |
| Number of children                                                | 392  | 392  | 189  | 93   | 142  | 142  | 67   | 27   |
| <b>Discordant exposure only within the sibling cluster</b>        |      |      |      |      |      |      |      |      |
| Exposed, %                                                        | 45.2 | 38.0 | 37.3 | 31.0 | 45.2 | 38.0 | 37.3 | 31.0 |
| Outcome, %                                                        | 6.0  | 2.9  | 2.2  | 0.8  | 2.0  | 1.0  | 0.8  | 0.6  |
| Number of children                                                | 4533 | 4533 | 1488 | 677  | 4533 | 4533 | 1488 | 677  |

We conducted a post-hoc sensitivity analysis to explore whether differences in point estimates from the primary analysis and the sibling analysis arose because the sibling analysis was performed in a selected population, i.e., children with at least one sibling with discordant antipsychotic exposure. In this sensitivity analysis, we compared estimates from a standard analysis and a sibling analysis both performed within the subgroup of children included in the sibling analysis in the pooled data from Finland, Iceland, Norway, and Sweden (N=4533 clusters). We restricted the cohort further to sibling clusters with both discordant exposures and outcomes, as these were the children that are informative in the sibling analysis.

Standard analysis: Cox proportional hazards regression models and robust standard errors accounting for the clustering of siblings (one baseline hazard for all subjects, standard errors accounted for the fact that siblings were expected to have more similar outcomes than unrelated individuals).

Sibling analysis: Cox proportional hazards regression models with stratification on sibling cluster (separate baseline hazards for each family, accounting for the differences between families attributed to factors that remain stable within the family, some of which were measured, e.g., mother's country of birth, and some unmeasured, e.g., genetic factors).

For ADHD, the estimates from the sibling analysis were slightly closer to the null than the standard analysis but very similar (eTable 11). For ASD, only the crude estimates were closer to the null. After adjusting for additional confounders, the sibling estimate was stronger, but with a wider confidence interval. For both ADHD and ASD, the fully adjusted HR from the analysis done in the standard way was close to the estimate from the primary adjusted analysis, suggesting that while the sibling sample was highly selected, it did not necessarily introduce selection bias once we controlled for measured confounders. Comparing the estimates from the sibling analysis to the standard analysis suggested that residual confounding by unmeasured familial factors was unsubstantial once we accounted for all measured confounders.
